# Supplementary material
Source: PubMed Central journal article supplement (PMC4716003)
Supplement: NIHMS731277-supplement-supplement_1.pdf [file NIHMS731277-supplement-supplement_1.pdf]

## Supplementary Materials

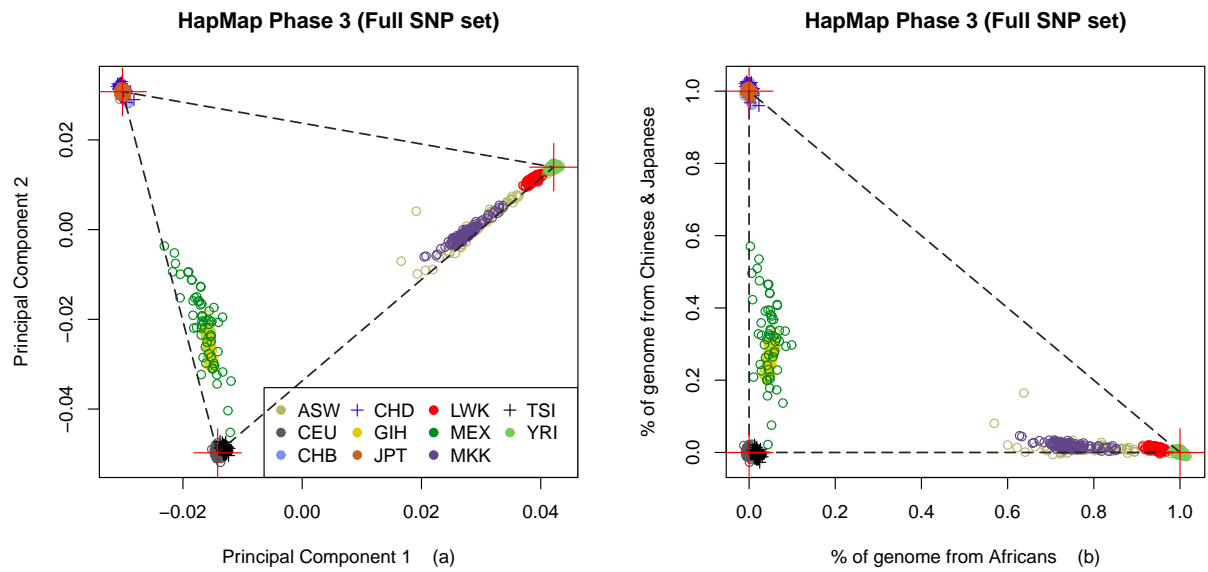

Figure S1: The principal component analysis on HapMap Phase 3 data, using the full set of 1,423,833 SNPs and 1,198 founders consisting of 11 populations: a) the first and second eigenvectors; b) a linear transformation of coordinate from a) followed by a translation, assuming three ancestral populations with surrogate samples: CEU, YRI and CHB+JPT. The average positions of three surrogate samples are masked by a red plus sign.

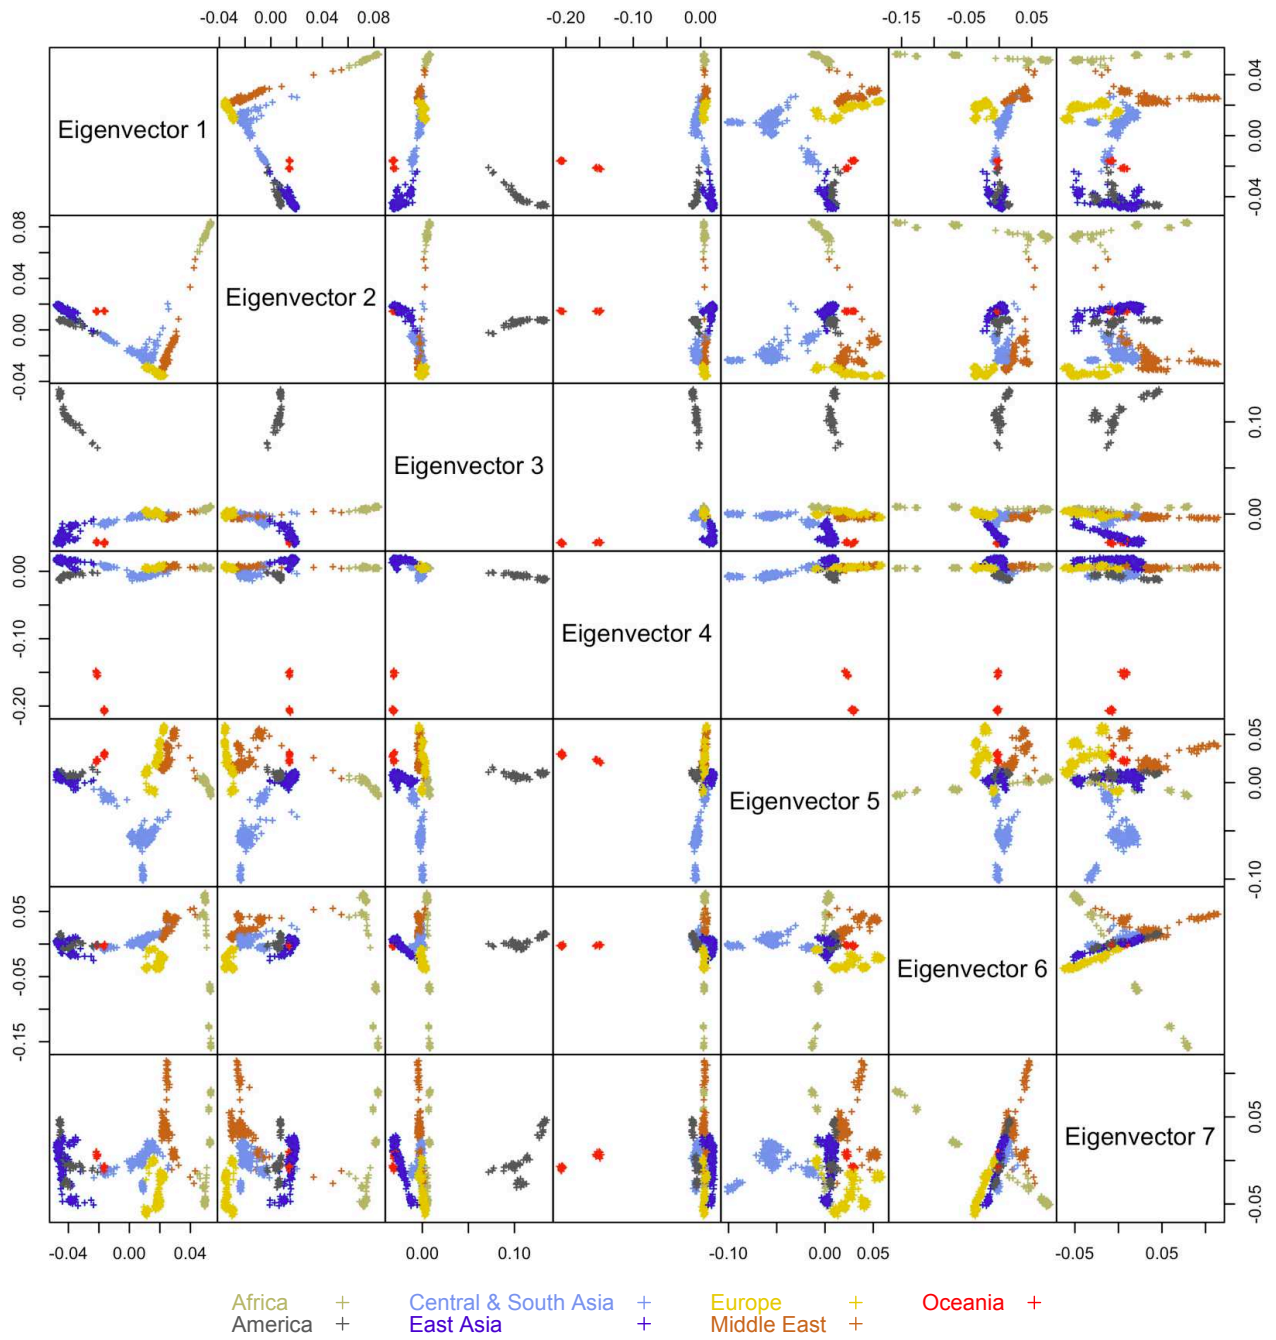

Figure S2: The eigenanalysis of EIGMIX on HGDP data using a full set of 644,258 SNPs.

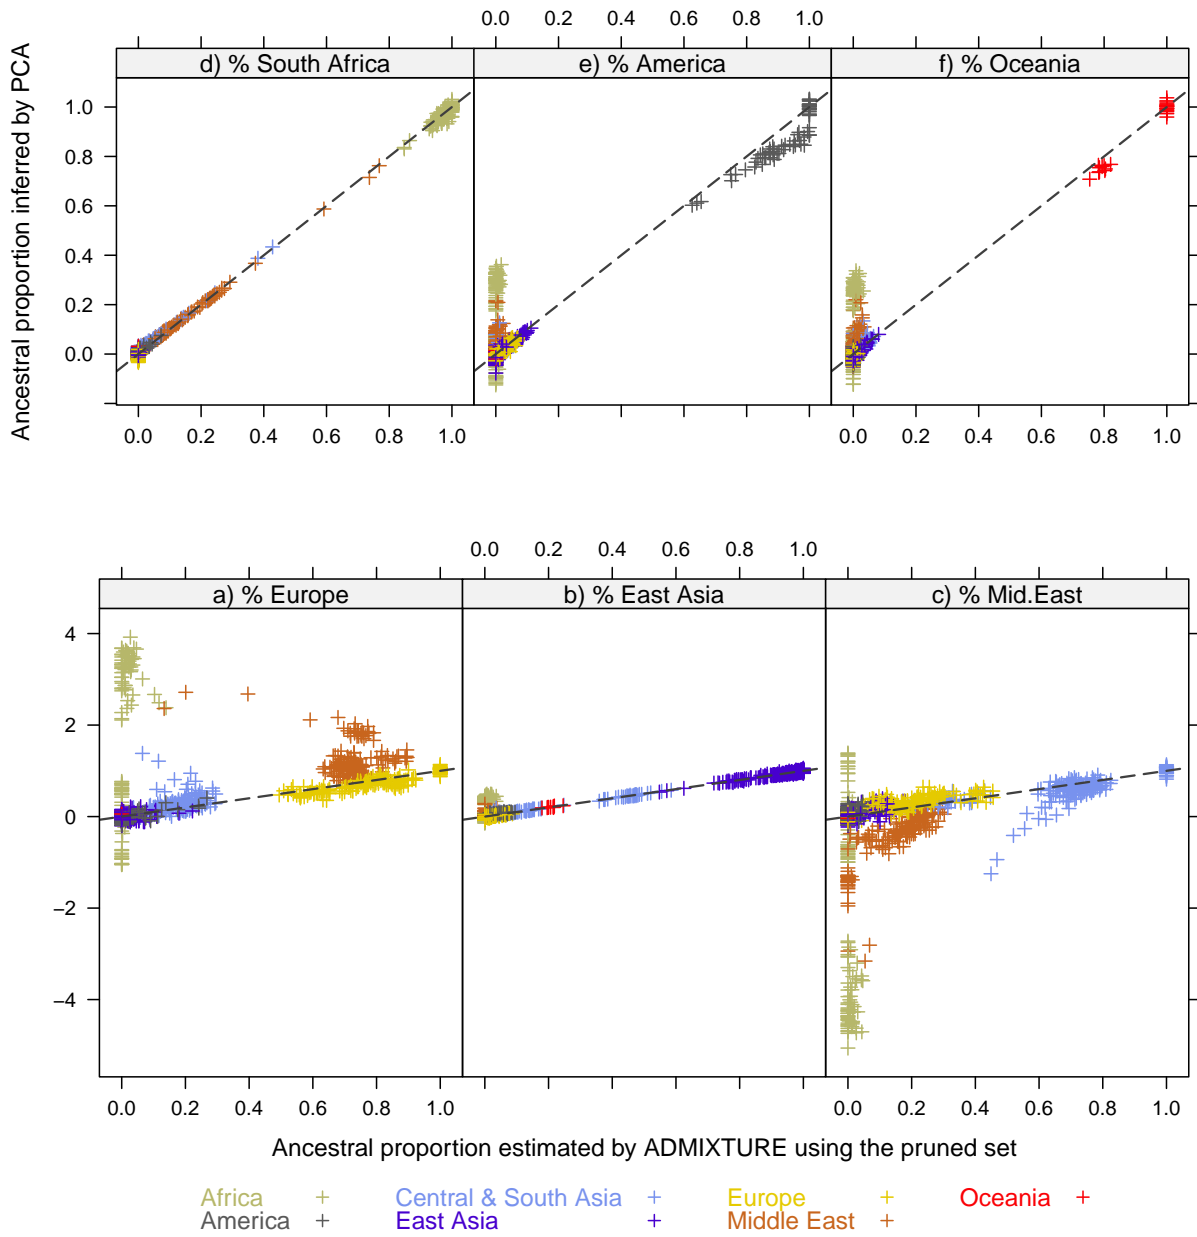

Figure S3: A comparison of ancestral proportions between PCA and supervised ADMIXTURE with six ancestral populations with a pruned set of 9,790 SNPs.

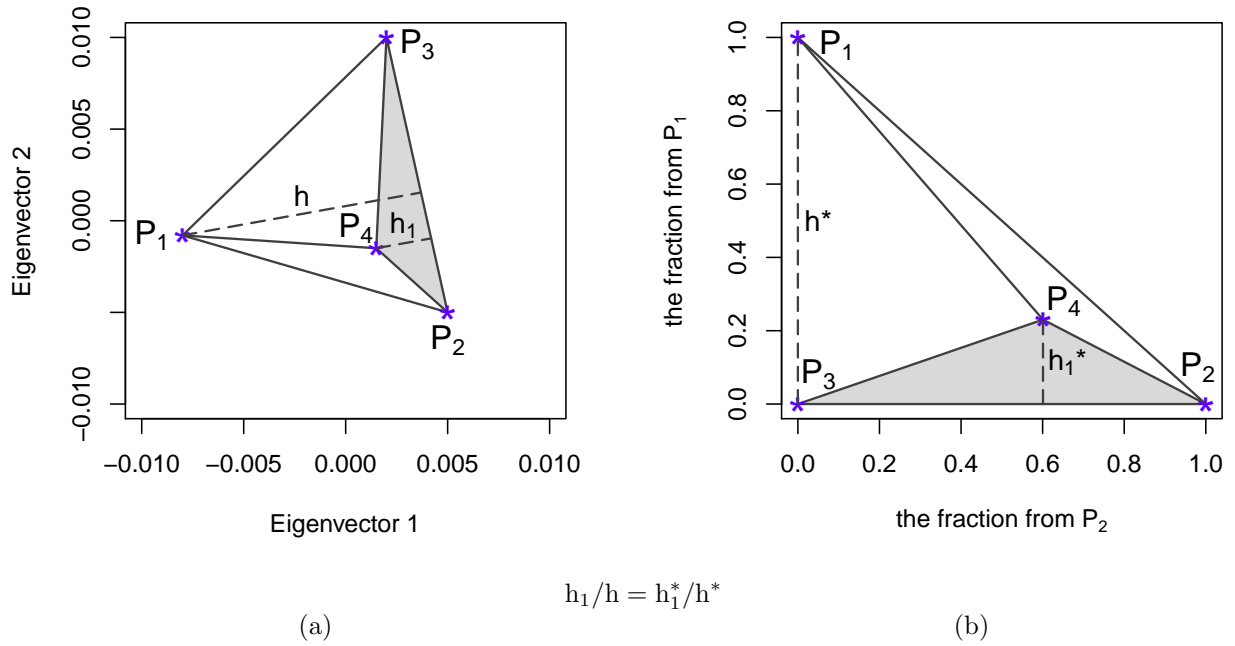

Figure S4: The eigenvectors of the four hypothetical populations for three-way admixture. Ma and Amos (2012) observed that a three-way admixed population  $P_4$  could divide the triangle of parental populations ( $P_1$ ,  $P_2$  and  $P_3$ ) into three small triangles with areas according to their admixture proportions, i.e., the area ratio ( $\Delta P_2P_3P_4 : \Delta P_1P_2P_3$ ) is the genome fraction of  $P_4$  from  $P_1$ . This area ratio equals to the ratio of heights of the base  $P_2P_3$ ,  $h_1/h$ . The mapping from the two-dimensional coordinate in (a) to that of (b) is an affine transformation, which is a linear transformation followed by a translation. Sets of parallel lines remain parallel after an affine transformation, and it also preserves ratios of distances between points lying on a straight line. Therefore, the ratio of new heights  $h_1^*/h^*$  in the coordinate of (b), equals to  $h_1/h$  in (a). Ma and Amos's observation can be confirmed under their theoretical framework with our proof of linear transformation.
